# Supplementary material
Source: PubMed Central journal article supplement (PMC3754589)
Supplement: JB.00572-13_zjb999092751so1.pdf [file JB.00572-13_zjb999092751so1.pdf]

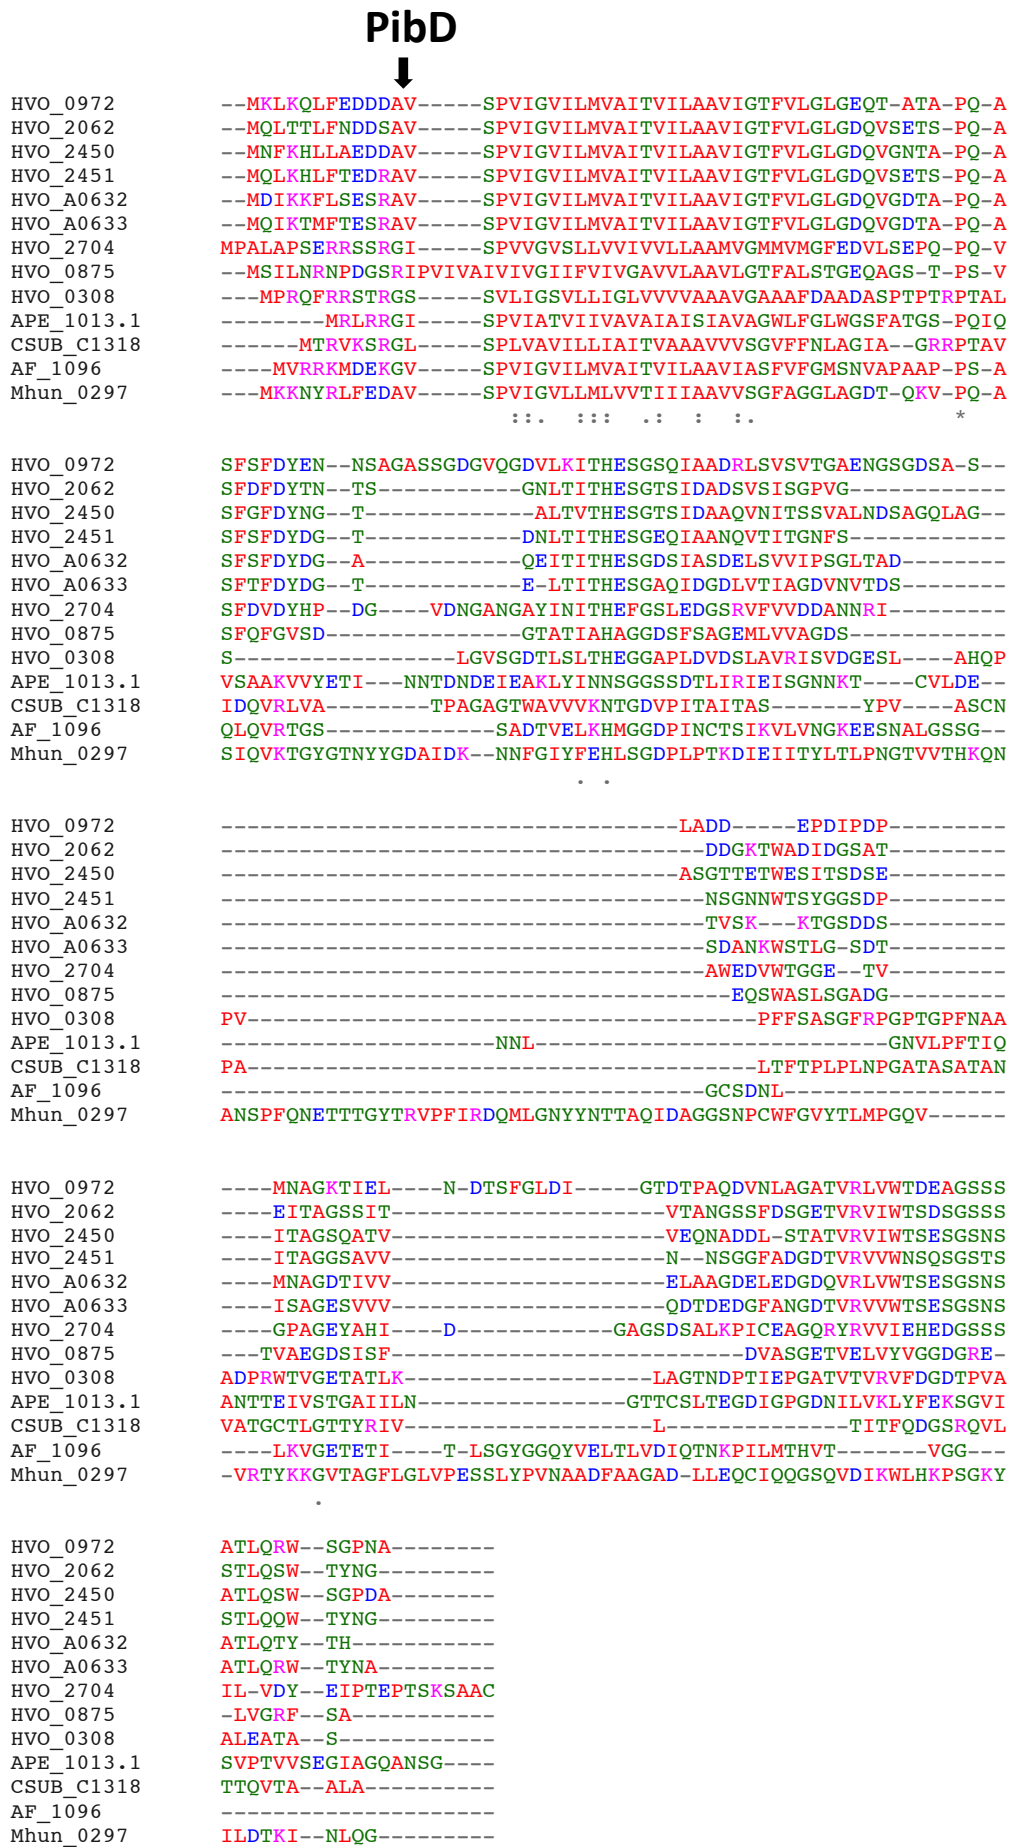

**Figure 1S: Duf1628 identified in proteins from diverse archaeal phyla. Amino acid sequence alignment of Duf1628-containing proteins of *H. volcanii*, *Aeropyrum pernix* (APE1013.1), *Candidatus Caldiarchaeumsubterraneum* (CSUB\_C1318), *Archaeoglobus fulgidus* (AF\_1096), and *Methanospirillum hungatei* (Mhun\_0297).**
