# Supplementary material
Source: PubMed Central journal article supplement (PMC3754589)
Supplement: JB.00572-13_zjb999092751so2.pdf [file JB.00572-13_zjb999092751so2.pdf]

**Table S1: Primers used for PCR amplification**

| Primer Name    | Sequence (5'-3')*                                          | Target Sequences                                                                                                                                                            |
|----------------|------------------------------------------------------------|-----------------------------------------------------------------------------------------------------------------------------------------------------------------------------|
| FW2062BamHI    | AAGCTAGGATCCAACGACGCCGACTGA                                | 700 bp upstream of Hvo_2062 start codon, extension towards gene                                                                                                             |
| RV2062XbaI     | GAACCTTCTAGACTTCGAGGGCGGCTT                                | 700 bp downstream of Hvo_2062 stop codon, extension towards gene                                                                                                            |
| FW2062updw     | GCAGGAGTATCCAACGAACCACTGAC                                 | Hvo_2062 stop codon, extension away from gene (fused with Hvo_2062 start codon)                                                                                             |
| RV2062updw     | GTCAGTGGTTCGTTGGATACTCCTGC                                 | Hvo_2062 start codon, extension away from gene (fused with Hvo_2062 stop codon)                                                                                             |
| FW2062NDEI     | ATTAATCATATGCAACTCACAACCTCTCTTCA                           | Hvo_2062 start codon, extension towards gene                                                                                                                                |
| RV2062EcoRIHis | TATATTGAATTCAGTGATGGTGATGGTGATGC<br>GGGCCGCCGCCGTTGTACGTCC | 1 bp upstream of Hvo_2062 stop codon, extension towards gene                                                                                                                |
| FWBamHI0972    | AAGCTAGGATCCACGGGATGGAAGACC                                | 700 bp upstream of Hvo_0972 start codon, extension towards gene                                                                                                             |
| RVXbaI0972     | GAACCTTCTAGAACCCACGGCGCGCCG                                | 700 bp downstream of Hvo_0972 stop codon, extension towards gene                                                                                                            |
| FW0972updw     | TACGAGAACCAACACCTCCCCGCGACTGAT                             | Hvo_0972 stop codon, extension away from gene (fused with Hvo_0972 start codon)                                                                                             |
| RV0972updw     | ATCAGTCGCGGGGAGGTGTTGGTTCTCGTA                             | Hvo_0972 start codon, extension away from gene (fused with Hvo_0972 stop codon)                                                                                             |
| FW0972NdeI     | ATTAATCATATGAAACTCAAACAACCTATTTCG                          | Hvo_0972 start codon, extension towards gene                                                                                                                                |
| RV0972EcoRIHis | TATATTGAATTCAGTGATGGTGATGGTGATGC<br>GGGCCGCCGCCGTTGGGACCGG | 1 bp upstream of Hvo_0972 stop codon, extension towards gene                                                                                                                |
| FWFlg0972A     | ATGAAACTCAAACAACCTATTCGAAGACGACGAC<br>GGTCAGGTCGGTATCGGG   | <i>pilA1</i> start codon extending 33 bp in gene attached to 27 bp downstream of <i>flgA1</i> start codon extending 18 bp in gene                                           |
| FWFlg0972B     | ACGGCTGGCTTCCTGGAACAGACAGCGACCGC<br>C                      | <i>flgA1</i> starting 108 bp downstream from start codon extending 15 bp attached to <i>pilA1</i> starting 123 bp downstream from start codon and extending 18 bp into gene |
| RVFlg0972B     | GGCGGTCGCTGTCTGTTCCAGGAAGCCAGCCG<br>T                      | The reverse complement of Flg0972FW                                                                                                                                         |
| FW2451BamHI    | AAGCTAGGATCCCGACATCGACAAGGG                                | 700 bp upstream of Hvo_2451 start codon, extension towards gene                                                                                                             |
| RV2450XbaI     | AGGTTCTCTAGACGACCTCACCTCGG                                 | 700 bp downstream of Hvo_2450 stop codon, extension towards gene                                                                                                            |
| FW2450.1updw   | TCGGACATAACGCATGTGAACGCGACACAGC                            | Hvo_2450 stop codon, extension away from gene (fused with Hvo_2451 start codon)                                                                                             |
| RV2450.1updw   | GCTGTGTCGCGTTCACATGCGTTATGTCCGA                            | Hvo_2451 start codon, extension away from gene (fused with Hvo_2450 stop codon)                                                                                             |
| FW2450NdeI     | AATTCACATATGAATTTCAAACACCTCCTCGC                           | Hvo_2450 start codon, extension towards gene                                                                                                                                |

|                 |                                                                |                                                                                         |
|-----------------|----------------------------------------------------------------|-----------------------------------------------------------------------------------------|
| RV2450EcoRIHis  | TGAATTGAATTCTCAGTGATGGTGATGGTGATG<br>CGGGCCGCCGCGTCGGGACCGGA   | 1 bp upstream of Hvo_2450 stop codon,<br>extension towards gene                         |
| FW2451NdeI      | AATTACCATATGCAACTCAAACATCTCTTCAC                               | Hvo_2451 start codon, extension towards<br>gene                                         |
| RV2451EcoRIHis  | GTAATTGAATTCTCAGTGATGGTGATGGTGATGC<br>GGGCCGCCTCCGTTGTAGGTCCA  | 1 bp upstream of Hvo_2451 stop codon,<br>extension towards gene                         |
| FWA0632BamHI    | AAGCTAGGATCCCCGTCGCCGTCGCG                                     | 700 bp upstream of Hvo_A0632 start<br>codon, extension towards gene                     |
| RVA0633XbaI     | GAACCTTCTAGACCCCGTCCGCGACG                                     | 700 bp downstream of Hvo_A0633 stop<br>codon, extension towards gene                    |
| FWA0632.3updw   | CCTGGGTAGAACATACCGGAATCAGC                                     | Hvo_A0633 stop codon, extension away<br>from gene (fused with Hvo_A0632 start<br>codon) |
| RVA0632.3updw   | GCTGATTCCGGTATGTTCTACCCAGG                                     | Hvo_A0632 start codon, extension away<br>from gene (fused with Hvo_A0633 stop<br>codon) |
| FWA0632NdeI     | CCCGCGCATATGGATATCAAGAAATTCCTTAG                               | Hvo_A0632 start codon, extension<br>towards gene                                        |
| RVA0632EcoRIHis | TATATTGAATTCTCAGTGATGGTGATGGTGATGC<br>GGGCCGCCGTCGCGTGTACGTTTG | 1 bp upstream of Hvo_A0632 stop codon,<br>extension towards gene                        |
| FWA0633NdeI     | ATCCTCCATATGCAAATCAAGACAATGTTTAC                               | Hvo_A0633 start codon, extension<br>towards gene                                        |
| RVA0633EcoRIHis | TATATTGAATTCTCAGTGATGGTGATGGTGATGC<br>GGGCCGCCGCGTTGTAGGTCCA   | 1 bp upstream of Hvo_A0633 stop codon,<br>extension towards gene                        |

\*Restriction endonuclease sites are underlined. Sequences encoding 6xHis tags are italicized.
