# Supplementary material
Source: PubMed Central journal article supplement (PMC3754589)
Supplement: JB.00572-13_zjb999092751so3.pdf [file JB.00572-13_zjb999092751so3.pdf]

Table S2

## Duf1628 (PilA) Analysis

| Species                                                                        | Accession Code | Gene       | FlaFind 1.2 motif | Co-localized w/ putative pilins | TFP gene/additional notes                                                                         |
|--------------------------------------------------------------------------------|----------------|------------|-------------------|---------------------------------|---------------------------------------------------------------------------------------------------|
| <b>(Crenarchaeaota)</b>                                                        |                |            |                   |                                 |                                                                                                   |
| <i>Thermoproteus neutrophilus</i><br>( <i>Pyrobaculum neutrophilum</i> V24Sta) | YP_001795233.1 | Tneu_1872  |                   | Y                               | Tneu_1871 type II secretion system protein downstream                                             |
| <i>Aeropyrum pernix</i> K1                                                     | NP_147667.2    | APE_1013.1 | RGIS              | N                               |                                                                                                   |
| <b>(Euryarchaeaota)</b>                                                        |                |            |                   |                                 |                                                                                                   |
| <i>Archaeoglobus fulgidus</i> DSM 4304                                         | NP_069925.1    | AF1096     | KGVS              | N                               |                                                                                                   |
| <i>Ferroplasma placidus</i> DSM 10642                                          | YP_003434907.1 | Ferp_0458  | RGIS              | N                               |                                                                                                   |
|                                                                                | YP_003435552.1 | Ferp_1118  | KALT              | N                               |                                                                                                   |
|                                                                                | YP_003435980.1 | Ferp_1554  | KAVS              | N                               |                                                                                                   |
| <i>Haloarcula marismortui</i> ATCC 43049                                       | YP_134014.1    | pNG2015    |                   | N                               |                                                                                                   |
|                                                                                | YP_134116.1    | pNG4035    |                   | N                               |                                                                                                   |
|                                                                                | YP_135052.1    | rmAC0290   |                   | N                               |                                                                                                   |
|                                                                                | YP_135368.1    | rmAC0658   | SAVS              | N                               |                                                                                                   |
|                                                                                | YP_136350.1    | rmAC1743   |                   | N                               |                                                                                                   |
|                                                                                | YP_136880.1    | rmAC2355   | RAVS              | N                               |                                                                                                   |
|                                                                                | YP_137899.1    | rmAC3526   | DAVS              | Y                               | rmAC3525 hypothetical protein (FlaFind1.2 positive) downstream same direction                     |
|                                                                                | YP_137901.1    | rmAC3528   | DAVS              | N                               | rmAC3526 hypothetical protein (FlaFind1.2 positive) upstream same direction, outside 2 gene limit |

|                                        |                |           |      |   |                                                                                  |
|----------------------------------------|----------------|-----------|------|---|----------------------------------------------------------------------------------|
| <i>Haloferax volcanii</i> DS2          | YP_003534069.1 | HVO_A0632 | RAVS | Y | HVO_A0633 hypothetical protein (FlaFind1.2 positive) downstream same direction   |
|                                        | YP_003534070.1 | HVO_A0633 | RAVS | Y | HVO_A0632 hypothetical protein (FlaFind1.2 positive) upstream same direction     |
|                                        | YP_003534385.1 | HVO_0308  | RGSS | N |                                                                                  |
|                                        | YP_003534935.1 | HVO_0875  |      | N |                                                                                  |
|                                        | YP_003535029.1 | HVO_0972  | DAVS | N |                                                                                  |
|                                        | YP_003536087.1 | HVO_2062  | SAVS | N |                                                                                  |
|                                        | YP_003536471.1 | HVO_2450  | DAVS | Y | HVO_2451 hypothetical protein (FlaFind1.2 positive) upstream same direction      |
|                                        | YP_003536472.1 | HVO_2451  | RAVS | Y | HVO_2450 hypothetical protein (FlaFind1.2 positive) downstream same direction    |
|                                        | YP_003536720.1 | HVO_2704  | RGIS | N |                                                                                  |
| <i>Natronomonas pharaonis</i> DSM 2160 | YP_325753.1    | NP0180A   |      | N |                                                                                  |
|                                        | YP_326594.1    | NP1876A   | RGAV | Y | NP1880A hypothetical protein (FlaFind1.2 positive) downstream opposite direction |
|                                        | YP_326632.1    | NP1956A   | RAVS | N |                                                                                  |
|                                        | YP_326707.1    | NP2110A   | KALA | N | NP2108A flagella cluster protein upstream opposite direction                     |
|                                        | YP_331148.1    | NP4846A   | RGQS | Y | NP4842A hypothetical protein (FlaFind1.2 positive) downstream same direction     |
|                                        | YP_331239.1    | NP5032A   | RAVA | Y | NP5030A hypothetical protein (FlaFind1.2 positive) upstream same direction       |
|                                        | YP_331401.1    | NP5358A   | RAVS | N |                                                                                  |
| <i>Methanosarcina mazei</i> Go1        | NP_632501.1    | MM_0477   | KGLA | N |                                                                                  |
|                                        | NP_633533.1    | MM_1509   |      | Y | MM_1510 hypothetical protein (FlaFind1.2 positive) upstream same direction       |
|                                        | NP_633534.1    | MM_1510   | KAVS | Y | MM_1511 hypothetical protein (FlaFind1.2 positive) upstream opposite direction   |
|                                        | NP_633535.1    | MM_1511   | KAVS | Y | MM_1510 hypothetical protein (FlaFind1.2 positive) upstream opposite direction   |
|                                        | NP_633537.1    | MM_1513   | SAVS | Y | MM_1514 hypothetical protein (FlaFind1.2 positive) upstream same direction       |
|                                        | NP_633538.1    | MM_1514   | EAAV | Y | MM_1516 Type II secretion system (FlaI) protein upstream same direction          |
|                                        | NP_633584.1    | MM_1560   | EGLS | N |                                                                                  |

|                                          |             |           |      |                                                                                          |                                                                                                                                                              |
|------------------------------------------|-------------|-----------|------|------------------------------------------------------------------------------------------|--------------------------------------------------------------------------------------------------------------------------------------------------------------|
| <i>Methanospirillum hungatei</i> JF-1    | YP_501742.1 | Mhun_0251 |      | Y                                                                                        | Mhun_0252 hypothetical protein (non Fla-Find positive duf1628) downstream same direction                                                                     |
|                                          | YP_501743.1 | Mhun_0252 | SGVS | Y                                                                                        | Mhun_0251 hypothetical protein (non Fla-Find positive duf1628) upstream same direction                                                                       |
|                                          | YP_501757.1 | Mhun_0267 | EAVS | Y                                                                                        | Mhun_0268 hypothetical protein (non FlaFind positive duf1628) upstream same direction                                                                        |
|                                          | YP_501758.1 | Mhun_0268 |      | Y                                                                                        | Mhun_0267 hypothetical protein (FlaFind1.2 positive) downstream same direction                                                                               |
|                                          | YP_501786.1 | Mhun_0296 | SAVS | Y                                                                                        | Mhun_0297 hypothetical protein (FlaFind1.2 positive) upstream same direction                                                                                 |
|                                          | YP_501787.1 | Mhun_0297 | DAVS | Y                                                                                        | direction; Mhun_0298 hypothetical protein (non FlaFind positive duf1628) upstream same direction                                                             |
|                                          | YP_501788.1 | Mhun_0298 | SAVS | Y                                                                                        | Mhun_0297 hypothetical protein (FlaFind1.2 positive) downstream same direction                                                                               |
|                                          | YP_501789.1 | Mhun_0299 |      | Y                                                                                        | Mhun_0297 hypothetical protein (FlaFind1.2 positive) downstream same direction                                                                               |
|                                          | YP_501799.1 | Mhun_0310 |      | Y                                                                                        | Mhun_0311 hypothetical protein (FlaFind1.2 positive) downstream same direction                                                                               |
|                                          | YP_501800.1 | Mhun_0311 | EAVS | Y                                                                                        | Mhun_0310 hypothetical protein (non FlaFind positive duf1628) upstream same direction                                                                        |
|                                          | YP_502683.1 | Mhun_1218 | DAVS | Y                                                                                        | Mhun_1219 hypothetical protein (FlaFind1.2 positive) downstream same direction                                                                               |
|                                          | YP_502684.1 | Mhun_1219 | DAVS | Y                                                                                        | Mhun_1218 hypothetical protein (FlaFind1.2 positive) upstream same direction                                                                                 |
|                                          | YP_503837.1 | Mhun_2416 | KAVS | N                                                                                        |                                                                                                                                                              |
|                                          | YP_503846.1 | Mhun_2426 | DALS | Y                                                                                        | Mhun_2427 hypothetical protein (FlaFind1.2 positive), Mhun_2428 hypothetical protein (FlaFind1.2 positive) upstream same direction                           |
|                                          | YP_503847.1 | Mhun_2427 | RAVS | Y                                                                                        | Mhun_2428 hypothetical protein (FlaFind1.2 positive) upstream same direction; Mhun_2426 hypothetical protein (FlaFind1.2 positive) downstream same direction |
|                                          | YP_504089.1 | Mhun_2674 | SAVS | N                                                                                        |                                                                                                                                                              |
|                                          | YP_504094.1 | Mhun_2680 |      | N                                                                                        |                                                                                                                                                              |
|                                          | YP_504114.1 | Mhun_2700 |      | Y                                                                                        | Mhun_2701 hypothetical protein (non FlaFind1.2 positive duf1628) downstream same direction                                                                   |
| YP_504115.1                              | Mhun_2701   |           | Y    | Mhun_2700 hypothetical protein (non FlaFind1.2 positive duf1628) upstream same direction |                                                                                                                                                              |
| <i>Thermoplasma acidophilum</i> DSM 1728 | NP_393973.1 | Ta0496    | KAVS | N                                                                                        |                                                                                                                                                              |
|                                          | NP_394310.1 | Ta0851    | KAVS | N                                                                                        |                                                                                                                                                              |
| <b>(Thaumarchaeota)</b>                  |             |           |      |                                                                                          |                                                                                                                                                              |

|                                   |                 |            |      |   |                                                                               |
|-----------------------------------|-----------------|------------|------|---|-------------------------------------------------------------------------------|
| <i>Caldiarchaeum subterraneum</i> | <b>BAJ51169</b> | CSUB_C1318 | RGLS | Y | CSUB_C1317 hypothetical protein (FlaFind1.2 positive) upstream same direction |
|-----------------------------------|-----------------|------------|------|---|-------------------------------------------------------------------------------|

FlaFind 1.2 positive [D/E] at -2

Not predicted by FlaFind 1.2

FlaFind positive [S] allowed at -2

**Co-localized with putative pilin/pilus-biosynthesis gene**

*Co-localized with non-FF positive Duf1628*
