# Supplementary material
Source: PubMed Central journal article supplement (PMC3754589)
Supplement: JB.00572-13_zjb999092751so4.pdf [file JB.00572-13_zjb999092751so4.pdf]

Table S3  
FlaFind 1.2 Results

| Organism                                                                                           | #FlaFind | #[DE] | NCBI accession | Processing |
|----------------------------------------------------------------------------------------------------|----------|-------|----------------|------------|
| <b>(Crenarchaeaota)</b>                                                                            |          |       |                |            |
| <i>Ignicoccus hospitalis</i><br><i>KIN4/I</i>                                                      | 18       | 3     | YP_001434791.1 | KGLT       |
|                                                                                                    |          |       | YP_001434819.1 | KGVI       |
|                                                                                                    |          |       | YP_001434961.1 | RAQS       |
|                                                                                                    |          |       | YP_001435045.1 | RALI       |
|                                                                                                    |          |       | YP_001435062.1 | RALL       |
|                                                                                                    |          |       | YP_001435091.1 | RGMT       |
|                                                                                                    |          |       | YP_001435109.1 | KGQA       |
|                                                                                                    |          |       | YP_001435207.1 | KAAL       |
|                                                                                                    |          |       | YP_001435259.1 | KGVS       |
|                                                                                                    |          |       | YP_001435387.1 | DALT       |
|                                                                                                    |          |       | YP_001435554.1 | EAVA       |
|                                                                                                    |          |       | YP_001435619.1 | RGLS       |
|                                                                                                    |          |       | YP_001435636.1 | RGAL       |
|                                                                                                    |          |       | YP_001435673.1 | EAEI       |
|                                                                                                    |          |       | YP_001435714.1 | KALV       |
|                                                                                                    |          |       | YP_001435778.1 | RGLT       |
|                                                                                                    |          |       | YP_001435787.1 | KAIT       |
|                                                                                                    |          |       | YP_001435924.1 | RALT       |
| <i>Acidianus hospitalis</i> W1                                                                     | 13       | 2     | YP_004457213.1 | KAIL       |
|                                                                                                    |          |       | YP_004457338.1 | EALS       |
|                                                                                                    |          |       | YP_004457353.1 | KGIS       |
|                                                                                                    |          |       | YP_004457908.1 | KALI       |
|                                                                                                    |          |       | YP_004458199.1 | KGLS       |
|                                                                                                    |          |       | YP_004458715.1 | EGII       |
|                                                                                                    |          |       | YP_004459028.1 | KGIS       |
|                                                                                                    |          |       | YP_004459031.1 | KGIS       |
|                                                                                                    |          |       | YP_004459032.1 | KGLS       |
|                                                                                                    |          |       | YP_004459045.1 | RALS       |
|                                                                                                    |          |       | YP_004459051.1 | KAVS       |
|                                                                                                    |          |       | YP_004459053.1 | RAII       |
|                                                                                                    |          |       | YP_004459251.1 | RAII       |
| <i>Thermoproteus</i><br><i>neutrophilus</i><br>( <i>Pyrobaculum</i><br><i>neutrophilum</i> V24Sta) | 17       | 3     | YP_001793514.1 | RGMT       |
|                                                                                                    |          |       | YP_001793519.1 | RGQA       |
|                                                                                                    |          |       | YP_001793521.1 | EAVV       |
|                                                                                                    |          |       | YP_001794187.1 | EAAA       |
|                                                                                                    |          |       | YP_001794192.1 | RGAV       |
|                                                                                                    |          |       | YP_001794246.1 | KALS       |
|                                                                                                    |          |       | YP_001794256.1 | KALA       |
|                                                                                                    |          |       | YP_001794391.1 | RGAL       |
|                                                                                                    |          |       | YP_001794406.1 | RAAA       |
|                                                                                                    |          |       | YP_001794466.1 | RGLL       |
| YP_001794548.1                                                                                     | RAIV     |       |                |            |

|                                             |      |   |                |                          |
|---------------------------------------------|------|---|----------------|--------------------------|
|                                             |      |   | YP_001794591.1 | RGLT                     |
|                                             |      |   | YP_001794818.1 | KALV                     |
|                                             |      |   | YP_001795165.1 | EALL                     |
|                                             |      |   | YP_001795225.1 | RALA                     |
|                                             |      |   | YP_001795235.1 | RGIS                     |
|                                             |      |   | YP_001795258.1 | RGAV                     |
|                                             |      |   |                |                          |
| <i>Sulfolobus acidocaldarius</i><br>DSM 639 | 20   | 1 | YP_255069.1    | RAVS                     |
|                                             |      |   | YP_255196.1    | KAFL                     |
|                                             |      |   | YP_255229.1    | KGAV                     |
|                                             |      |   | YP_255417.1    | KAFI                     |
|                                             |      |   | YP_255688.1    | KAIS                     |
|                                             |      |   | YP_255805.1    | KGVS                     |
|                                             |      |   | YP_255818.1    | RGLA                     |
|                                             |      |   | YP_255934.1    | KGIS                     |
|                                             |      |   | YP_256110.1    | KAIS                     |
|                                             |      |   | YP_256284.1    | KAIS                     |
|                                             |      |   | YP_256287.1    | KAIS                     |
|                                             |      |   | YP_256288.1    | RAIS                     |
|                                             |      |   | YP_256306.1    | KAIT                     |
|                                             |      |   | YP_256485.1    | <sup>1</sup> EADL / KAVI |
|                                             |      |   | YP_256555.1    | KGIL                     |
|                                             |      |   | YP_256686.1    | KAVS                     |
|                                             |      |   | YP_256752.1    | RGMS                     |
| YP_256841.1                                 | KAQS |   |                |                          |
| YP_256893.1                                 | RALS |   |                |                          |
| YP_256897.1                                 | RALS |   |                |                          |
|                                             |      |   |                |                          |
| <i>Sulfolobus solfataricus</i> P2           | 28   | 0 | NP_341612.1    | KGIS                     |
|                                             |      |   | NP_341682.1    | KAIS                     |
|                                             |      |   | NP_341683.1    | KGLS                     |
|                                             |      |   | NP_342020.1    | KGFS                     |
|                                             |      |   | NP_342480.1    | RGLS                     |
|                                             |      |   | NP_342629.1    | KAIS                     |
|                                             |      |   | NP_342630.1    | KAFL                     |
|                                             |      |   | NP_342637.1    | RGIA                     |
|                                             |      |   | NP_342696.1    | KGFV                     |
|                                             |      |   | NP_342996.1    | KGDV                     |
|                                             |      |   | NP_343020.1    | KGFI                     |
|                                             |      |   | NP_343270.1    | RAVS                     |
|                                             |      |   | NP_343534.1    | RGLS                     |
|                                             |      |   | NP_343686.1    | KGLA                     |
|                                             |      |   | NP_343692.1    | RALV                     |
|                                             |      |   | NP_343942.1    | KAIL                     |
|                                             |      |   | NP_343949.1    | KGLA                     |
|                                             |      |   | NP_344010.1    | KGQA                     |
|                                             |      |   | NP_344011.1    | RGIS                     |
| NP_344033.1                                 | KALS |   |                |                          |
| NP_344166.1                                 | RAIS |   |                |                          |
| NP_344167.1                                 | KGLT |   |                |                          |

|                                   |      |   |             |      |
|-----------------------------------|------|---|-------------|------|
|                                   |      |   | NP_344287.1 | KAQS |
|                                   |      |   | NP_344376.1 | KAIS |
|                                   |      |   | NP_344405.1 | KALS |
|                                   |      |   | NP_344446.1 | KAQS |
|                                   |      |   | NP_344447.1 | KGLS |
|                                   |      |   | NP_344448.1 | KALS |
|                                   |      |   |             |      |
| <i>Sulfolobus tokodaii str. 7</i> | 25   | 1 | NP_375949.1 | KGLI |
|                                   |      |   | NP_375952.1 | KAVS |
|                                   |      |   | NP_375988.1 | KGLS |
|                                   |      |   | NP_376573.1 | KGFL |
|                                   |      |   | NP_376705.1 | RAIL |
|                                   |      |   | NP_376779.1 | RGMS |
|                                   |      |   | NP_376991.1 | KAQS |
|                                   |      |   | NP_376992.1 | KALS |
|                                   |      |   | NP_376993.1 | RGIS |
|                                   |      |   | NP_377260.1 | KAVI |
|                                   |      |   | NP_377357.1 | KGIS |
|                                   |      |   | NP_377358.1 | KGIS |
|                                   |      |   | NP_377519.1 | KALI |
|                                   |      |   | NP_377558.1 | RAVS |
|                                   |      |   | NP_377585.1 | RGIS |
|                                   |      |   | NP_377606.1 | RGLS |
|                                   |      |   | NP_377700.1 | KGLL |
|                                   |      |   | NP_377899.1 | KGIS |
|                                   |      |   | NP_378022.1 | KAIS |
|                                   |      |   | NP_378254.1 | KGIS |
|                                   |      |   | NP_378304.1 | KALL |
|                                   |      |   | NP_378392.1 | RAVI |
|                                   |      |   | NP_378522.1 | KGLA |
| NP_378524.1                       | EAIS |   |             |      |
| NP_378542.1                       | RGVS |   |             |      |
|                                   |      |   |             |      |
| <i>Aeropyrum pernix K1</i>        | 19   | 1 | NP_147341.2 | RAEV |
|                                   |      |   | NP_147363.2 | RGLS |
|                                   |      |   | YP_874839.1 | RGFL |
|                                   |      |   | YP_874845.1 | RALA |
|                                   |      |   | NP_147585.2 | RGQA |
|                                   |      |   | NP_147586.2 | RGQA |
|                                   |      |   | NP_147617.2 | RAIL |
|                                   |      |   | NP_147656.2 | RAAA |
|                                   |      |   | NP_147667.2 | RGIS |
|                                   |      |   | YP_874887.1 | RAIL |
|                                   |      |   | NP_148067.2 | RGEA |
|                                   |      |   | NP_148102.2 | RAIT |
|                                   |      |   | YP_874912.1 | KALT |
|                                   |      |   | NP_147427.1 | RGLS |
|                                   |      |   | NP_147851.1 | RGLA |
|                                   |      |   | NP_148115.1 | KAQA |
| NP_148253.1                       | RGIV |   |             |      |

|                                                  |      |   |                |                          |
|--------------------------------------------------|------|---|----------------|--------------------------|
|                                                  |      |   | NP_148254.1    | RGIV                     |
|                                                  |      |   | NP_148659.1    | EAIA                     |
|                                                  |      |   |                |                          |
| <i>Pyrobaculum aerophilum</i><br><i>str. IM2</i> | 20   | 2 | NP_558427.1    | RGIA                     |
|                                                  |      |   | NP_558497.1    | RAVL                     |
|                                                  |      |   | NP_558507.1    | KGLL                     |
|                                                  |      |   | NP_558525.1    | RAIV                     |
|                                                  |      |   | NP_558553.1    | RGAA                     |
|                                                  |      |   | NP_558607.1    | EGAV                     |
|                                                  |      |   | NP_558678.1    | RAVL                     |
|                                                  |      |   | NP_558950.1    | RGQV                     |
|                                                  |      |   | NP_559008.1    | RGAV                     |
|                                                  |      |   | NP_559060.1    | KAIM                     |
|                                                  |      |   | NP_559205.1    | KGLS                     |
|                                                  |      |   | NP_559325.1    | KAAL                     |
|                                                  |      |   | NP_559593.1    | RALL                     |
|                                                  |      |   | NP_559633.1    | RGVL                     |
|                                                  |      |   | NP_559658.1    | EAVI                     |
|                                                  |      |   | NP_559988.1    | RGLT                     |
|                                                  |      |   | NP_559995.1    | KAVL                     |
| NP_560194.1                                      | KALI |   |                |                          |
| NP_560716.1                                      | KAIA |   |                |                          |
| NP_560884.1                                      | KGVI |   |                |                          |
| <b>(Euryarchaeota)</b>                           |      |   |                |                          |
| <i>Archaeoglobus fulgidus</i><br><i>DSM 4304</i> | 19   | 4 | NP_069205.1    | KGVS                     |
|                                                  |      |   | NP_069293.1    | KAFL                     |
|                                                  |      |   | NP_069592.1    | KAVS                     |
|                                                  |      |   | NP_069594.1    | RGVS                     |
|                                                  |      |   | NP_069595.1    | KGQM                     |
|                                                  |      |   | NP_069596.1    | RGQT                     |
|                                                  |      |   | NP_069669.1    | RAEI                     |
|                                                  |      |   | NP_069832.1    | KGAL                     |
|                                                  |      |   | NP_069887.1    | KGFT                     |
|                                                  |      |   | NP_069888.1    | KGFT                     |
|                                                  |      |   | NP_069925.1    | KGVS                     |
|                                                  |      |   | NP_069989.1    | <sup>1</sup> DALA / KGLI |
|                                                  |      |   | NP_069991.1    | <sup>1</sup> DALA / KGLI |
|                                                  |      |   | NP_070006.1    | EAVI                     |
|                                                  |      |   | NP_070074.1    | RAIL                     |
|                                                  |      |   | NP_070104.1    | RAAI                     |
|                                                  |      |   | NP_070404.1    | KALV                     |
| NP_070454.1                                      | KAVS |   |                |                          |
| NP_070983.1                                      | EGET |   |                |                          |
|                                                  |      |   | YP_003434883.1 | EAAV                     |
|                                                  |      |   | YP_003434884.1 | KALL                     |
|                                                  |      |   | YP_003434907.1 | RGIS                     |
|                                                  |      |   | YP_003434934.1 | RGFA                     |

|                                       |    |   |                |      |
|---------------------------------------|----|---|----------------|------|
| <i>Ferroglobus placidus</i> DSM 10642 | 31 | 6 | YP_003434935.1 | RAVL |
|                                       |    |   | YP_003434936.1 | KAVL |
|                                       |    |   | YP_003434949.1 | KAVA |
|                                       |    |   | YP_003435362.1 | RAVS |
|                                       |    |   | YP_003435363.1 | KALS |
|                                       |    |   | YP_003435365.1 | KAQI |
|                                       |    |   | YP_003435366.1 | RAQT |
|                                       |    |   | YP_003435367.1 | RAQL |
|                                       |    |   | YP_003435531.1 | KGLI |
|                                       |    |   | YP_003435552.1 | KALT |
|                                       |    |   | YP_003435649.1 | RAVA |
|                                       |    |   | YP_003435651.1 | RAMA |
|                                       |    |   | YP_003435687.1 | KAVS |
|                                       |    |   | YP_003435689.1 | EAIL |
|                                       |    |   | YP_003435696.1 | RALL |
|                                       |    |   | YP_003435851.1 | DALS |
|                                       |    |   | YP_003435865.1 | KALT |
|                                       |    |   | YP_003435882.1 | RGAI |
|                                       |    |   | YP_003435922.1 | KGLV |
|                                       |    |   | YP_003435961.1 | KALS |
|                                       |    |   | YP_003435980.1 | KAVS |
|                                       |    |   | YP_003436296.1 | EGIV |
|                                       |    |   | YP_003436378.1 | KALV |
|                                       |    |   | YP_003436449.1 | KGEM |
|                                       |    |   | YP_003436468.1 | RGEV |
|                                       |    |   | YP_003436505.1 | EAEA |
|                                       |    |   | YP_003436707.1 | EGMV |
|                                       |    |   |                |      |
|                                       |    |   | YP_133989.1    | RGQV |
|                                       |    |   | YP_134047.1    | EGFV |
|                                       |    |   | YP_134146.1    | RAQS |
|                                       |    |   | YP_134176.1    | EGLV |
|                                       |    |   | YP_134284.1    | RADT |
|                                       |    |   | YP_134748.1    | EGQS |
|                                       |    |   | YP_134830.1    | KGLL |
|                                       |    |   | YP_134889.1    | EGQA |
|                                       |    |   | YP_135469.1    | RAAI |
|                                       |    |   | YP_135479.1    | KAAM |
|                                       |    |   | YP_135528.1    | KAVI |
|                                       |    |   | YP_135627.1    | RGAI |
|                                       |    |   | YP_135869.1    | EGLT |
|                                       |    |   | YP_135892.1    | RGVS |
|                                       |    |   | YP_135893.1    | RGVS |
|                                       |    |   | YP_135894.1    | RGQL |
|                                       |    |   | YP_135895.1    | RGQA |
|                                       |    |   | YP_135896.1    | RAQT |
|                                       |    |   | YP_136054.1    | RAQA |
|                                       |    |   | YP_136056.1    | RAVS |
|                                       |    |   | YP_136057.1    | RAQS |
|                                       |    |   | YP_136058.1    | RGQS |

|                                             |      |    |                |                   |
|---------------------------------------------|------|----|----------------|-------------------|
| <i>Haloarcula marismortui</i><br>ATCC 43049 | 48   | 11 | YP_136188.1    | DAIV              |
|                                             |      |    | YP_136253.1    | RGFA              |
|                                             |      |    | YP_136345.1    | RAQS              |
|                                             |      |    | YP_136435.1    | EALS              |
|                                             |      |    | YP_136443.1    | RAMS              |
|                                             |      |    | YP_136447.1    | DAAA              |
|                                             |      |    | YP_136520.1    | RGQL              |
|                                             |      |    | YP_136521.1    | RAQL              |
|                                             |      |    | YP_136522.1    | RAQT              |
|                                             |      |    | YP_136741.1    | RGQV              |
|                                             |      |    | YP_136812.1    | RALA              |
|                                             |      |    | YP_136880.1    | RAVS              |
|                                             |      |    | YP_136958.1    | RGFA              |
|                                             |      |    | YP_137016.1    | RALM              |
|                                             |      |    | YP_137283.1    | RGIA              |
|                                             |      |    | YP_137381.1    | RGVA              |
|                                             |      |    | YP_137423.1    | RAAA              |
|                                             |      |    | YP_137459.1    | RGFL              |
|                                             |      |    | YP_137731.1    | RGLV              |
|                                             |      |    | YP_137804.1    | RGFM              |
|                                             |      |    | YP_137898.1    | RAVI              |
| YP_137899.1                                 | DAVS |    |                |                   |
| YP_137901.1                                 | DAVS |    |                |                   |
| YP_137922.1                                 | RALS |    |                |                   |
| YP_137950.1                                 | RGLA |    |                |                   |
| YP_138166.1                                 | DAAM |    |                |                   |
| <hr/>                                       |      |    |                |                   |
|                                             |      |    | YP_003533169.1 | KAAA              |
|                                             |      |    | YP_003533212.1 | RAVL              |
|                                             |      |    | YP_003533221.1 | RAVL              |
|                                             |      |    | YP_003533445.1 | RAFL              |
|                                             |      |    | YP_003533476.1 | RGQL              |
|                                             |      |    | YP_003533499.1 | RGDA              |
|                                             |      |    | YP_003534066.1 | RAIA              |
|                                             |      |    | YP_003534069.1 | RAVS              |
|                                             |      |    | YP_003534070.1 | RAVS              |
|                                             |      |    | YP_003534231.1 | RAMA              |
|                                             |      |    | YP_003534233.1 | DAIL              |
|                                             |      |    | YP_003534269.1 | RAQL              |
|                                             |      |    | YP_003534324.1 | DGLV              |
|                                             |      |    | YP_003534385.1 | <sup>2</sup> RGSS |
|                                             |      |    | YP_003534389.1 | EAAS              |
|                                             |      |    | YP_003534506.1 | RAFV              |
|                                             |      |    | YP_003534676.1 | RGQL              |
|                                             |      |    | YP_003534678.1 | RAQT              |
|                                             |      |    | YP_003534680.1 | RGQA              |
|                                             |      |    | YP_003534811.1 | RAQA              |
|                                             |      |    | YP_003535003.1 | KAQA              |
| YP_003535029.1                              | DAVS |    |                |                   |
| YP_003535206.1                              | RAVS |    |                |                   |

|                                           |      |   |                |      |
|-------------------------------------------|------|---|----------------|------|
| <i>Haloferax volcanii</i> DS2             | 47   | 9 | YP_003535207.1 | RGVS |
|                                           |      |   | YP_003535208.1 | RGQL |
|                                           |      |   | YP_003535209.1 | RAQA |
|                                           |      |   | YP_003535210.1 | RAQT |
|                                           |      |   | YP_003535261.1 | RGQV |
|                                           |      |   | YP_003535262.1 | RGQV |
|                                           |      |   | YP_003535280.1 | DGLI |
|                                           |      |   | YP_003535368.1 | DAIA |
|                                           |      |   | YP_003535386.1 | RGDL |
|                                           |      |   | YP_003535692.1 | RAFV |
|                                           |      |   | YP_003535787.1 | RAAV |
|                                           |      |   | YP_003535934.1 | RAVA |
|                                           |      |   | YP_003535988.1 | DAIL |
|                                           |      |   | YP_003536097.1 | RAIL |
|                                           |      |   | YP_003536412.1 | RGVS |
|                                           |      |   | YP_003536430.1 | RALI |
|                                           |      |   | YP_003536441.1 | RAVT |
|                                           |      |   | YP_003536470.1 | KAVI |
|                                           |      |   | YP_003536471.1 | DAVS |
|                                           |      |   | YP_003536472.1 | RAVS |
| YP_003536481.1                            | DAIT |   |                |      |
| YP_003536619.1                            | RAFA |   |                |      |
| YP_003536702.1                            | RALL |   |                |      |
| YP_003536720.1                            | RGIS |   |                |      |
| <i>Natronomonas pharaonis</i><br>DSM 2160 | 34   | 5 | YP_325734.1    | RAFA |
|                                           |      |   | YP_325737.1    | RGQL |
|                                           |      |   | YP_325738.1    | RGQL |
|                                           |      |   | YP_325739.1    | RGQA |
|                                           |      |   | YP_325740.1    | RAMS |
|                                           |      |   | YP_325741.1    | RAQS |
|                                           |      |   | YP_326002.1    | DAVA |
|                                           |      |   | YP_326498.1    | RAVI |
|                                           |      |   | YP_326594.1    | RGAV |
|                                           |      |   | YP_326596.1    | DAIV |
|                                           |      |   | YP_326632.1    | RAVS |
|                                           |      |   | YP_326674.1    | KAVV |
|                                           |      |   | YP_326695.1    | RGQV |
|                                           |      |   | YP_326696.1    | RGQV |
|                                           |      |   | YP_326697.1    | RGQV |
|                                           |      |   | YP_326707.1    | KALA |
|                                           |      |   | YP_327104.1    | RGVS |
|                                           |      |   | YP_327133.1    | DALS |
|                                           |      |   | YP_327152.1    | RAAT |
|                                           |      |   | YP_327299.1    | RAVL |
| YP_327341.1                               | RGQI |   |                |      |
| YP_327536.1                               | RAAV |   |                |      |
| YP_330733.1                               | RAVS |   |                |      |
| YP_330734.1                               | RAVS |   |                |      |
| YP_330735.1                               | RGVS |   |                |      |

|                                               |      |   |                |      |
|-----------------------------------------------|------|---|----------------|------|
|                                               |      |   | YP_330736.1    | RGQL |
|                                               |      |   | YP_330737.1    | RGQA |
|                                               |      |   | YP_330738.1    | RGQT |
|                                               |      |   | YP_331080.1    | EAAL |
|                                               |      |   | YP_331126.1    | DAII |
|                                               |      |   | YP_331146.1    | RGQS |
|                                               |      |   | YP_331148.1    | RGQS |
|                                               |      |   | YP_331238.1    | RAVL |
|                                               |      |   | YP_331401.1    | RAVS |
|                                               |      |   |                |      |
| <i>Methanocaldococcus jannaschii</i> DSM 2661 | 19   | 5 | NP_246981.1    | KGQL |
|                                               |      |   | NP_247131.1    | DAII |
|                                               |      |   | NP_247153.1    | KGLA |
|                                               |      |   | NP_247201.1    | EGVA |
|                                               |      |   | NP_247405.1    | KGQL |
|                                               |      |   | NP_247503.1    | EALA |
|                                               |      |   | NP_247824.1    | RGQI |
|                                               |      |   | NP_247828.1    | KAQV |
|                                               |      |   | NP_247886.1    | RGAM |
|                                               |      |   | NP_247887.1    | RGAM |
|                                               |      |   | NP_247888.1    | RGAI |
|                                               |      |   | NP_247949.1    | EGLI |
|                                               |      |   | NP_248009.1    | KGDA |
|                                               |      |   | NP_248133.1    | DGFL |
|                                               |      |   | NP_248282.1    | KGFI |
|                                               |      |   | NP_248403.1    | KGQI |
| NP_248405.1                                   | KAIS |   |                |      |
| NP_248406.1                                   | KAIS |   |                |      |
| NP_248473.1                                   | KAQI |   |                |      |
|                                               |      |   |                |      |
| <i>Methanococcus maripaludis</i> C5           | 16   | 1 | YP_001096841.1 | KGQL |
|                                               |      |   | YP_001097235.1 | KGQI |
|                                               |      |   | YP_001097390.1 | KGQL |
|                                               |      |   | YP_001097449.1 | DGIS |
|                                               |      |   | YP_001097526.1 | RGQL |
|                                               |      |   | YP_001097527.1 | KGQI |
|                                               |      |   | YP_001097596.1 | KGQV |
|                                               |      |   | YP_001097873.1 | KAAL |
|                                               |      |   | YP_001097949.1 | KGQV |
|                                               |      |   | YP_001097952.1 | RAQI |
|                                               |      |   | YP_001098232.1 | KGQV |
|                                               |      |   | YP_001098233.1 | KGQL |
|                                               |      |   | YP_001098250.1 | KGAV |
|                                               |      |   | YP_001098251.1 | KGAS |
|                                               |      |   | YP_001098252.1 | KGAS |
| YP_001098253.1                                | KGAS |   |                |      |
|                                               |      |   |                |      |
|                                               |      |   | NP_632346.1    | KGFT |
|                                               |      |   | NP_632347.1    | KGFT |
|                                               |      |   | NP_632442.1    | KAFT |



|                                          |      |    |             |      |
|------------------------------------------|------|----|-------------|------|
| <i>Methanosarcina mazei</i><br>Go1       | 18   | 5  | NP_632501.1 | KGLA |
|                                          |      |    | NP_632551.1 | KALT |
|                                          |      |    | NP_632808.1 | DAAS |
|                                          |      |    | NP_633142.1 | KGDT |
|                                          |      |    | NP_633144.1 | KGIL |
|                                          |      |    | NP_633174.1 | DGAS |
|                                          |      |    | NP_633534.1 | KAVS |
|                                          |      |    | NP_633535.1 | KAVS |
|                                          |      |    | NP_633538.1 | EAAV |
|                                          |      |    | NP_633584.1 | EGLS |
|                                          |      |    | NP_633594.1 | KALI |
|                                          |      |    | NP_633951.1 | RAII |
|                                          |      |    | NP_634567.1 | KADS |
|                                          |      |    | NP_634786.1 | EAVI |
| NP_634852.1                              | RGQV |    |             |      |
| <i>Methanospirillum hungatei</i><br>JF-1 | 20   | 12 | YP_501529.1 | KGLV |
|                                          |      |    | YP_501598.1 | EAIS |
|                                          |      |    | YP_501751.1 | KAAI |
|                                          |      |    | YP_501757.1 | EAVS |
|                                          |      |    | YP_501787.1 | DAVS |
|                                          |      |    | YP_501800.1 | EAVS |
|                                          |      |    | YP_502347.1 | DGMV |
|                                          |      |    | YP_502453.1 | RALS |
|                                          |      |    | YP_502683.1 | DAVS |
|                                          |      |    | YP_502684.1 | DAVS |
|                                          |      |    | YP_502693.1 | EADS |
|                                          |      |    | YP_503265.1 | DGLI |
|                                          |      |    | YP_503496.1 | RGLV |
|                                          |      |    | YP_503837.1 | KAVS |
|                                          |      |    | YP_503846.1 | DALS |
|                                          |      |    | YP_503847.1 | RAVS |
|                                          |      |    | YP_503848.1 | DGLS |
|                                          |      |    | YP_504081.1 | KAIV |
|                                          |      |    | YP_504190.1 | KGIV |
| YP_504543.1                              | DGFS |    |             |      |
| <i>Picrophilus torridus</i> DSM<br>9790  | 9    | 1  | YP_022796.1 | KGVA |
|                                          |      |    | YP_022880.1 | KALI |
|                                          |      |    | YP_022933.1 | KAIV |
|                                          |      |    | YP_022939.1 | KAFA |
|                                          |      |    | YP_023272.1 | DALL |
|                                          |      |    | YP_023299.1 | KALV |
|                                          |      |    | YP_023382.1 | RGII |
|                                          |      |    | YP_023701.1 | KAMA |
| YP_023895.1                              | KGAI |    |             |      |
|                                          |      |    | NP_577924.1 | KGIT |
|                                          |      |    | NP_578016.1 | KGLT |
|                                          |      |    | NP_578066.1 | KGAI |

|                                     |      |   |             |      |
|-------------------------------------|------|---|-------------|------|
| <i>Pyrococcus furiosus</i> DSM 3638 | 18   | 1 | NP_578125.1 | KGFL |
|                                     |      |   | NP_578136.1 | KALV |
|                                     |      |   | NP_578201.1 | RAQT |
|                                     |      |   | NP_578216.1 | KAIV |
|                                     |      |   | NP_578728.1 | EGAI |
|                                     |      |   | NP_579033.1 | RGFI |
|                                     |      |   | NP_579034.1 | KGFI |
|                                     |      |   | NP_579137.1 | KGLL |
|                                     |      |   | NP_579238.1 | KGQV |
|                                     |      |   | NP_579239.1 | KAQL |
|                                     |      |   | NP_579399.1 | KALI |
|                                     |      |   | NP_579449.1 | RGLS |
|                                     |      |   | NP_579490.1 | RGVL |
|                                     |      |   | NP_579794.1 | KALA |
| NP_877886.1                         | KALI |   |             |      |
| <i>Pyrococcus horikoshii</i> OT3    | 23   | 3 | NP_142203.1 | KGVI |
|                                     |      |   | NP_142312.1 | KGAS |
|                                     |      |   | NP_142361.1 | DALL |
|                                     |      |   | NP_142515.1 | KGAV |
|                                     |      |   | NP_142516.1 | RGAV |
|                                     |      |   | NP_142517.1 | KGAV |
|                                     |      |   | NP_142518.1 | KGAI |
|                                     |      |   | NP_142519.1 | RGAI |
|                                     |      |   | NP_142877.1 | KGLI |
|                                     |      |   | NP_143023.1 | KAFL |
|                                     |      |   | NP_143221.1 | KGQI |
|                                     |      |   | NP_143224.1 | RGQL |
|                                     |      |   | NP_143225.1 | RGFI |
|                                     |      |   | NP_143226.1 | RGFI |
|                                     |      |   | NP_143281.1 | RALL |
|                                     |      |   | NP_143529.1 | EAFM |
|                                     |      |   | NP_143700.1 | KGIS |
|                                     |      |   | NP_877783.1 | DAII |
|                                     |      |   | NP_877787.1 | KAAI |
|                                     |      |   | NP_877792.1 | RAQS |
| NP_142856.2                         | KGEA |   |             |      |
| NP_143223.2                         | RGQT |   |             |      |
| NP_877850.1                         | RALA |   |             |      |
|                                     |      |   | YP_182416.1 | KGVL |
|                                     |      |   | YP_182451.1 | KGAV |
|                                     |      |   | YP_182452.1 | RGAV |
|                                     |      |   | YP_182453.1 | RGAV |
|                                     |      |   | YP_182454.1 | RGAI |
|                                     |      |   | YP_182455.1 | RGAI |
|                                     |      |   | YP_182474.1 | RAVL |
|                                     |      |   | YP_182735.1 | KGFV |
|                                     |      |   | YP_182769.1 | KAFL |
|                                     |      |   | YP_182811.1 | KALV |

|                                          |      |   |                |      |
|------------------------------------------|------|---|----------------|------|
| <i>Thermococcus kodakaraensis</i> KOD1   | 38   | 0 | YP_182942.1    | KALV |
|                                          |      |   | YP_182982.1    | KAAI |
|                                          |      |   | YP_183074.1    | RALL |
|                                          |      |   | YP_183119.1    | RAVS |
|                                          |      |   | YP_183184.1    | KALV |
|                                          |      |   | YP_183253.1    | RAAV |
|                                          |      |   | YP_183517.1    | KAVI |
|                                          |      |   | YP_183642.1    | RAII |
|                                          |      |   | YP_183657.1    | RAQA |
|                                          |      |   | YP_183794.1    | KALA |
|                                          |      |   | YP_183802.1    | RAVL |
|                                          |      |   | YP_183876.1    | RGAS |
|                                          |      |   | YP_183984.1    | KALV |
|                                          |      |   | YP_184076.1    | RGFV |
|                                          |      |   | YP_184077.1    | RGQI |
|                                          |      |   | YP_184078.1    | RGQT |
|                                          |      |   | YP_184079.1    | RGQL |
|                                          |      |   | YP_184080.1    | RGQI |
|                                          |      |   | YP_184095.1    | KAHV |
|                                          |      |   | YP_184114.1    | KALI |
|                                          |      |   | YP_184115.1    | KAII |
|                                          |      |   | YP_184212.1    | KGIT |
|                                          |      |   | YP_184319.1    | KALL |
| YP_184475.1                              | KAVA |   |                |      |
| YP_184533.1                              | KAVA |   |                |      |
| YP_184588.1                              | RALA |   |                |      |
| YP_184591.1                              | RAAL |   |                |      |
| YP_184708.1                              | RAAS |   |                |      |
| <b>(Nanoarchaeaota)</b>                  |      |   |                |      |
| <i>Thermoplasma acidophilum</i> DSM 1728 | 6    | 2 | NP_393520.1    | KGDA |
|                                          |      |   | NP_393973.1    | KAVS |
|                                          |      |   | NP_394027.1    | KAET |
|                                          |      |   | NP_394136.1    | EAIA |
|                                          |      |   | NP_394310.1    | KAVS |
|                                          |      |   | NP_393478.1    | DALL |
| <b>(Nanoarchaeaota)</b>                  |      |   |                |      |
| <i>Nanoarchaeum equitans</i> Kin-4-M     | 6    | 0 | AAR38990.1     | RGAI |
|                                          |      |   | AAR38993.1     | RALS |
|                                          |      |   | AAR39224.1     | RAVS |
|                                          |      |   | NP_963429.1    | RGAI |
|                                          |      |   | NP_963432.1    | RALS |
|                                          |      |   | NP_963663.1    | RAVS |
| <b>(Korarchaeaota)</b>                   |      |   |                |      |
|                                          |      |   | YP_001736547.1 | KAFL |
|                                          |      |   | YP_001736571.1 | KGET |
|                                          |      |   | YP_001736602.1 | EADL |

|                                                |      |   |                |      |
|------------------------------------------------|------|---|----------------|------|
| <i>Candidatus Korarchaeum cryptofilum OPF8</i> | 12   | 3 | YP_001736752.1 | DGLS |
|                                                |      |   | YP_001736786.1 | RAIV |
|                                                |      |   | YP_001737094.1 | RGIS |
|                                                |      |   | YP_001737117.1 | KGAI |
|                                                |      |   | YP_001737228.1 | RGIS |
|                                                |      |   | YP_001737438.1 | KGVI |
|                                                |      |   | YP_001737493.1 | RALI |
|                                                |      |   | YP_001737681.1 | RGVL |
|                                                |      |   | YP_001737744.1 | EALI |
| <b>(Thaumarchaeota)</b>                        |      |   |                |      |
| <i>Cenarchaeum symbiosum A</i>                 | 15   | 3 | YP_874978.1    | DGAI |
|                                                |      |   | YP_875121.1    | RGEL |
|                                                |      |   | YP_875170.1    | KAVI |
|                                                |      |   | YP_875416.1    | RALL |
|                                                |      |   | YP_875435.1    | KGAV |
|                                                |      |   | YP_875473.1    | KAQI |
|                                                |      |   | YP_875504.1    | RGAA |
|                                                |      |   | YP_875624.1    | KGAL |
|                                                |      |   | YP_875640.1    | RAQS |
|                                                |      |   | YP_875832.1    | KAAA |
|                                                |      |   | YP_875838.1    | RAII |
|                                                |      |   | YP_876160.1    | DALM |
|                                                |      |   | YP_876407.1    | KGMI |
| YP_876433.1                                    | RALA |   |                |      |
| YP_876664.1                                    | DGLM |   |                |      |
| <i>Nitrosopumilus maritimus SCM1</i>           | 10   | 0 | YP_001581374.1 | KAIT |
|                                                |      |   | YP_001581516.1 | KGIV |
|                                                |      |   | YP_001581542.1 | KGVI |
|                                                |      |   | YP_001581788.1 | KGIV |
|                                                |      |   | YP_001581973.1 | KGVI |
|                                                |      |   | YP_001582384.1 | RAQA |
|                                                |      |   | YP_001582436.1 | KAAI |
|                                                |      |   | YP_001582533.1 | KGIL |
|                                                |      |   | YP_001582748.1 | KGIA |
| YP_001582814.1                                 | KAML |   |                |      |
| <i>Candidatus Caldiarchaeum subterraneum</i>   | 18   | 3 | BAJ49887.1     | RGFL |
|                                                |      |   | BAJ50000.1     | DAFI |
|                                                |      |   | BAJ50029.1     | DGFV |
|                                                |      |   | BAJ50061.1     | RALL |
|                                                |      |   | BAJ50088.1     | RALA |
|                                                |      |   | BAJ50104.1     | RAAT |
|                                                |      |   | BAJ50209.1     | RAVL |
|                                                |      |   | BAJ50391.1     | KALS |
|                                                |      |   | BAJ50432.1     | KAVS |
|                                                |      |   | BAJ50511.1     | KALS |
|                                                |      |   | BAJ50526.1     | KAVS |

|                                               |      |   |               |      |
|-----------------------------------------------|------|---|---------------|------|
|                                               |      |   | BAJ50687.1    | EGFM |
|                                               |      |   | BAJ50731.1    | RAQL |
|                                               |      |   | BAJ50734.1    | KALT |
|                                               |      |   | BAJ50793.1    | RAAL |
|                                               |      |   | BAJ51168.1    | RAIS |
|                                               |      |   | BAJ51240.1    | KAVS |
|                                               |      |   | BAJ51484.1    | KAVV |
|                                               |      |   |               |      |
| <i>Candidatus Nitrosoarchaeum limnia SFB1</i> | 19   | 3 | ZP_08256578.1 | DAFL |
|                                               |      |   | ZP_08256729.1 | RGVI |
|                                               |      |   | ZP_08256731.1 | RGVI |
|                                               |      |   | ZP_08256733.1 | RGVI |
|                                               |      |   | ZP_08256854.1 | RAVA |
|                                               |      |   | ZP_08256855.1 | RGIS |
|                                               |      |   | ZP_08256856.1 | RGVT |
|                                               |      |   | ZP_08256965.1 | RAQI |
|                                               |      |   | ZP_08257222.1 | KGMI |
|                                               |      |   | ZP_08257473.1 | KGIL |
|                                               |      |   | ZP_08257478.1 | KAQL |
|                                               |      |   | ZP_08257789.1 | DGML |
|                                               |      |   | ZP_08257791.1 | KAIT |
|                                               |      |   | ZP_08257919.1 | RAII |
|                                               |      |   | ZP_08257925.1 | DAEI |
|                                               |      |   | ZP_08257985.1 | KGIA |
| ZP_08258111.1                                 | RGQL |   |               |      |
| ZP_08258137.1                                 | KAAI |   |               |      |
| ZP_08258142.1                                 | KGLV |   |               |      |

FlaFind1.2 positive containing [DE] at -2

<sup>1</sup>FlaFind1.2 positive with both [KR] and [KRDE] motif

<sup>2</sup>YP\_003534385.1 (hvo\_0308) FlaFind1.2 positive upon reannotation  
Contains Duf1628
